# Supplementary material for: Unlocking Cognitive Potential: Association of Sarcopenia and Mediterranean Diet on Cognitive Function in Community-Dwelling Elderly of the Dalmatian Region
Source: MDPI journal article supplement (doi:10.3390/nu16070991), 2024-03-28
Supplement: s1 [file s1]

**Table S1.** Correlations of Mediterranean diet adherence and Mini-Mental State Exam (MMSE).

|                                                 | Sperman's correlation coefficient Rho ( <i>p</i> value) |
|-------------------------------------------------|---------------------------------------------------------|
|                                                 | Total score MMSE                                        |
| Grains (including bread, rice, and pasta)       | 0.143 (0.13)                                            |
| Olive oil (including preparation of food)       | -0.053 (0.57)                                           |
| Nuts                                            | 0.052 (0.58)                                            |
| Fresh fruits (excluding fruit juices)           | -0.073 (0.44)                                           |
| Vegetables                                      | 0.046 (0.63)                                            |
| Legumes                                         | 0.038 (0.69)                                            |
| Eggs                                            | 0.160 (0.09)                                            |
| Fish (white and blue)                           | -0.069 (0.47)                                           |
| Sweets (sugar, cakes, cookies, and fruit sodas) | -0.068 (0.48)                                           |

**Table S2.** Predictors of cognitive deficit—parts of Mediterranean Diet Serving Score.

|                                                            | $\beta$ | Wald | <i>p</i> Value | OR   | 95% CI    |
|------------------------------------------------------------|---------|------|----------------|------|-----------|
| Potato                                                     | -0.55   | 3.77 | 0.05           | 0.58 | 0.33–1.01 |
| Red meat (pork, beef, and veal)                            | -0.52   | 3.85 | 0.05           | 0.59 | 0.35–0.99 |
| Wine (in quantity: 1 glass for women, 1–2 glasses for man) | 18.5    | 0    | 0.99           | -    | -         |
| <b>MDSS total score</b>                                    | 0.09    | 1.96 | 0.16           | 1.1  | 0.96–1.26 |

$\beta$ —regression coefficients.

**Table S3.** Cognitive test performance differences between two groups of patients categorized by MMSE score.

|                    | Median (IQR)                             |                                             |                            | <i>p</i> * |
|--------------------|------------------------------------------|---------------------------------------------|----------------------------|------------|
|                    | No cognitive decline<br>( <i>n</i> = 79) | Moderate/Severe decline<br>( <i>n</i> = 35) | Total<br>( <i>n</i> = 114) |            |
| <b>TMT – A (s)</b> | 49.1 (0–80.9)                            | 59.5 (33.72–90)                             | 49.2 (0–81.99)             | <0.001     |
| <b>TMT - B (s)</b> | 46.5 (0–96.5)                            | 67.8 (38.4–120)                             | 54 (0–100.2)               | <0.001     |
| <b>SDMT (n)</b>    | 6 (0–20)                                 | 12 (0–24.5)                                 | 8 (0–20)                   | <0.001     |

\* *p*-values were obtained with Mann–Whitney U test.

**Table S4.** Statistically significant positive correlations between MMSE score and other variables.

|                                          | Spearman's correlation coefficient Rho ( <i>p</i> value) |
|------------------------------------------|----------------------------------------------------------|
|                                          | Total score MMSE                                         |
| <b>Muscle strength (kg)</b>              | 0.438 (<0.001)                                           |
| <b>Blood pressure – systolic (mmHg)</b>  | 0.364 (<0.001)                                           |
| <b>Blood pressure – diastolic (mmHg)</b> | 0.254 (0.01)                                             |
| <b>Upper arm circumference (cm)</b>      | 0.342 (0.05)                                             |
| <b>MNA total score</b>                   | 0.206 (0.03)                                             |
| <b>TMT – A (min)</b>                     | 0.326 (<0.001)                                           |
| <b>TMT – A (s)</b>                       | 0.326 (<0.001)                                           |
| <b>TMT – B (min)</b>                     | 0.528 (<0.001)                                           |
| <b>TMT – B (s)</b>                       | 0.517 (<0.001)                                           |
| <b>SDMT, (n)</b>                         | 0.569 (<0.001)                                           |
| Potato                                   | 0.205 (0.03)                                             |
| Milk and dairy products                  | 0.185 (0.05)                                             |
| White meat (chicken and turkey)          | 0.310 (<0.001)                                           |
| Red meat (pork, beef, and veal)          | 0.258 (0.01)                                             |

---

**SF-36 quality of life**

|                                          |                |
|------------------------------------------|----------------|
| Physical functioning                     | 0.279 (<0.001) |
| Role limitation due to physical problems | 0.238 (0.01)   |
| Mental health                            | 0.228 (0.02)   |
| Energy vitality                          | 0.309 (<0.001) |
| Pain                                     | 0.226 (0.02)   |
| General health perception                | 0.262 (0.01)   |
| Change in health                         | 0.198 (0.04)   |

---
